# Supplementary material for: Prevalence of Human Norovirus GII.4 Sydney 2012 [P31] between 2019 and 2021 among Young Children from Rural Communities in South Africa
Source: Viruses. 2023 Aug 2;15(8):1682. doi: 10.3390/v15081682 (PMC10458076; doi:10.3390/v15081682)
Supplement: Supplementary file 1 [file viruses-15-01682-s001.zip › Data S1. Supplementary data.txt]

#
#
#  Percent Identity  Matrix - created by Clustal2.1 
#
#

     1: KY012285.1  100.00   75.26   78.12   78.12   77.85   77.70   78.12   78.47   76.95   77.32   78.47   78.40   78.65   78.05   77.07   77.82   77.85   78.40   78.40   77.51   77.70   77.35   77.85   77.08   77.16   77.78   78.12   78.05   78.05   78.12   77.70   77.70   77.45   78.47   78.75   77.32   77.43   76.58   39.34   35.40   38.53   39.64   40.59   39.06   40.88   40.51   42.34   40.15
     2: OP600465.1   75.26  100.00   91.25   91.25   91.25   91.58   91.58   91.92   93.19   93.19   91.92   91.89   91.76   91.50   92.25   95.24   94.95   94.95   94.95   93.60   95.34   93.94   93.92   93.94   93.60   94.28   94.28   94.28   94.28   94.61   94.93   94.95   95.44   92.59   91.92   94.98   94.28   95.70   44.26   39.75   44.95   45.05   39.50   39.10   39.72   40.07   40.07   39.36
     3: OM985018.1   78.12   91.25  100.00   99.43   99.66   96.79   97.91   98.12   98.02   98.03   97.93   98.31   97.00   96.26   96.31   95.80   94.99   96.01   95.96   95.83   96.04   95.62   96.30   95.34   96.01   96.41   96.64   96.69   96.63   96.20   96.28   96.40   96.84   96.82   96.23   96.48   96.58   96.46   37.62   36.25   38.18   42.03   42.57   40.78   42.01   41.63   42.68   41.49
     4: OM993272.1   78.12   91.25   99.43  100.00   99.66   97.52   98.48   98.29   98.61   98.62   98.48   98.31   97.00   96.26   96.31   96.74   94.99   96.56   95.96   96.38   96.67   95.62   96.30   96.57   96.57   96.95   96.64   96.69   96.63   96.76   96.28   96.40   96.84   97.33   96.95   96.92   97.14   97.04   37.81   36.25   38.18   42.03   41.89   40.78   41.31   41.63   42.68   41.49
     5: OP600468.1   77.85   91.25   99.66   99.66  100.00   97.98   97.65   97.99   98.57   98.57   97.99   98.31   97.00   96.26   96.31   96.26   95.00   95.96   95.96   95.65   97.13   95.62   95.33   95.97   95.65   96.64   96.31   96.63   96.63   96.31   96.28   95.96   96.84   96.31   96.30   97.49   95.97   96.06   45.90   40.37   44.04   44.14   41.64   40.60   41.96   42.31   43.01   41.61
     6: OM948743.1   77.70   91.58   96.79   97.52   97.98  100.00   97.71   97.36   97.82   97.83   97.55   98.65   96.63   95.58   95.94   95.80   95.56   96.20   96.30   97.53   96.46   95.96   96.62   95.85   97.14   96.40   96.97   97.02   96.97   96.20   96.28   96.70   97.19   96.42   96.04   96.92   96.58   96.65   38.12   37.08   38.18   42.03   40.97   40.35   40.49   40.88   41.93   41.11
     7: OM961396.1   78.12   91.58   97.91   98.48   97.65   97.71  100.00   99.43   99.40   99.41   99.24   98.99   96.25   95.58   96.31   96.74   95.28   96.95   96.63   96.58   97.29   95.96   96.97   96.58   96.58   96.96   97.32   97.35   97.31   96.77   96.28   96.70   97.19   97.15   96.57   97.14   97.53   97.44   36.63   36.25   36.97   41.30   42.21   41.43   41.63   42.05   43.10   41.73
     8: OM961398.1   78.47   91.92   98.12   98.29   97.99   97.36   99.43  100.00   99.01   99.41   99.44   99.32   96.63   95.92   96.31   96.56   95.58   97.15   96.97   96.77   97.29   96.30   97.31   96.62   96.77   97.16   97.65   97.68   97.64   96.96   96.62   97.00   97.54   97.37   96.60   97.14   97.34   97.44   36.63   35.83   36.97   41.30   42.11   41.21   41.53   42.26   42.89   41.73
     9: OM985015.1   76.95   93.19   98.02   98.61   98.57   97.82   99.40   99.01  100.00   99.21   99.60  100.00   97.22   96.38   96.31   96.83   95.62   96.83   96.77   96.63   97.08   96.42   97.12   96.83   96.63   97.02   97.49   97.54   97.49   96.83   97.12   97.46   97.49   97.42   96.63   96.92   98.02   97.22   36.18   35.84   36.36   41.30   41.45   40.96   40.81   41.18   42.27   40.70
    10: OM985016.1   77.32   93.19   98.03   98.62   98.57   97.83   99.41   99.41   99.21  100.00   99.61   99.28   97.22   96.38   96.31   97.05   95.62   97.24   96.77   97.05   97.50   96.42   97.12   97.24   97.04   97.44   97.49   97.54   97.49   97.24   97.12   97.46   97.49   97.64   97.05   97.36   98.23   97.64   37.13   36.84   37.58   42.03   41.53   41.18   40.89   41.83   42.48   40.95
    11: OM970798.1   78.47   91.92   97.93   98.48   97.99   97.55   99.24   99.44   99.60   99.61  100.00  100.00   96.63   95.92   96.31   96.76   95.58   97.34   96.97   96.96   97.50   96.30   97.31   96.80   96.96   97.35   97.65   97.68   97.64   97.15   96.62   97.00   97.54   97.56   96.79   97.36   97.53   97.64   36.63   35.42   36.97   41.30   41.90   41.00   41.33   42.05   42.68   41.25
    12: OQ048860.1   78.40   91.89   98.31   98.31   98.31   98.65   98.99   99.32  100.00   99.28  100.00  100.00   96.63   95.92   96.31   96.59   96.62   96.96   96.96   96.96   97.84   96.28   97.30   96.62   96.62   97.30   97.64   97.64   97.64   96.96   96.62   96.62   97.54   96.62   95.95   98.20   96.62   96.76   45.08   39.75   43.12   43.24   42.14   40.75   42.35   42.70   43.42   41.99
    13: KY012284.1   78.65   91.76   97.00   97.00   97.00   96.63   96.25   96.63   97.22   97.22   96.63   96.63  100.00   98.50   98.80   96.63   96.25   96.25   96.25   97.00   98.02   96.25   96.25   95.88   97.00   96.63   96.25   96.25   96.25   97.00   97.00   97.00   97.67   97.00   96.63   97.62   97.00   96.83   45.08   40.37   43.12   43.24   43.65   42.68   43.65   43.65   44.84   43.25
    14: KY012282.1   78.05   91.50   96.26   96.26   96.26   95.58   95.58   95.92   96.38   96.38   95.92   95.92   98.50  100.00   99.26   95.88   95.58   95.58   95.58   95.92   97.10   95.24   95.58   95.24   95.92   95.92   95.58   95.58   95.58   96.26   95.92   95.92   96.81   96.94   96.60   96.74   96.60   96.01   45.08   40.99   43.12   43.24   43.17   42.97   44.09   43.73   44.44   43.01
    15: KY012277.1   77.07   92.25   96.31   96.31   96.31   95.94   96.31   96.31   96.31   96.31   96.31   96.31   98.80   99.26  100.00   95.94   95.94   95.94   95.94   96.31   97.05   95.57   95.94   95.57   95.94   95.94   95.94   95.94   95.94   96.31   96.31   96.31   96.68   97.42   96.68   96.68   97.05   95.94   45.08   41.78   43.12   43.24   42.97   42.97   43.36   43.36   44.14   42.58
    16: OM970802.1   77.82   95.24   95.80   96.74   96.26   95.80   96.74   96.56   96.83   97.05   96.76   96.59   96.63   95.88   95.94  100.00   98.21   99.62   99.66   97.13   98.96   98.64   98.63   98.66   97.89   99.05   98.98   99.00   98.98   99.43   99.66   99.09   99.30   97.14   96.76   97.58   97.90   98.62   36.63   35.83   38.18   41.30   40.78   40.13   40.16   41.35   41.14   40.19
    17: OP257195.1   77.85   94.95   94.99   94.99   95.00   95.56   95.28   95.58   95.62   95.62   95.58   96.62   96.25   95.58   95.94   98.21  100.00   98.22   99.66   96.76   97.50   98.65   98.33   97.05   97.06   97.35   98.99   99.01   98.99   97.94   98.99   98.50   99.30   95.87   95.27   97.19   96.46   97.81   43.38   38.86   43.09   43.20   42.24   40.72   41.41   42.02   42.02   41.41
    18: OM993270.1   78.40   94.95   96.01   96.56   95.96   96.20   96.95   97.15   96.83   97.24   97.34   96.96   96.25   95.58   95.94   99.62   98.22  100.00  100.00   97.34   98.96   98.65   98.99   98.86   97.71   99.24   99.33   99.34   99.33   99.43   98.99   99.10   99.30   97.53   96.96   97.58   97.91   98.82   36.63   35.42   38.18   41.30   40.90   40.13   40.41   41.72   41.51   40.62
    19: OQ048859.1   78.40   94.95   95.96   95.96   95.96   96.30   96.63   96.97   96.77   96.77   96.97   96.96   96.25   95.58   95.94   99.66   99.66  100.00  100.00   97.98   98.92   98.65   98.99   98.32   98.32   98.99   99.33   99.33   99.33   99.33   98.99   98.99   99.30   96.97   96.30   98.57   97.64   99.28   43.44   38.51   43.12   43.24   41.99   40.60   42.20   42.55   42.55   41.84
    20: OM948744.1   77.51   93.60   95.83   96.38   95.65   97.53   96.58   96.77   96.63   97.05   96.96   96.96   97.00   95.92   96.31   97.13   96.76   97.34   97.98  100.00   96.88   97.64   97.65   96.77   98.29   97.15   97.99   98.01   97.98   97.34   97.97   98.50   98.95   97.15   96.39   97.80   97.72   97.83   36.63   35.83   37.58   41.30   40.29   39.70   39.63   40.50   41.13   40.19
    21: ON005452.1   77.70   95.34   96.04   96.67   97.13   96.46   97.29   97.29   97.08   97.50   97.50   97.84   98.02   97.10   97.05   98.96   97.50   98.96   98.92   96.88  100.00   98.57   98.56   98.54   97.08   98.75   98.92   98.94   98.92   99.17   99.28   99.37   98.92   97.92   97.08   97.36   98.12   98.12   38.89   37.68   37.58   41.30   41.22   40.54   40.77   41.44   41.44   40.45
    22: OP600467.1   77.35   93.94   95.62   95.62   95.62   95.96   95.96   96.30   96.42   96.42   96.30   96.28   96.25   95.24   95.57   98.64   98.65   98.65   98.65   97.64   98.57  100.00   98.31   97.98   97.98   98.65   98.65   98.65   98.65   98.99   98.65   98.65   98.95   96.63   95.96   98.21   97.31   98.92   43.44   38.51   43.12   43.24   41.64   40.60   41.84   42.20   42.20   41.49
    23: OQ048861.1   77.85   93.92   96.30   96.30   95.33   96.62   96.97   97.31   97.12   97.12   97.31   97.30   96.25   95.58   95.94   98.63   98.33   98.99   98.99   97.65   98.56   98.31  100.00   98.65   97.99   99.33   99.66   99.66   99.66   98.99   98.65   98.65   98.94   96.63   95.95   98.20   97.31   98.92   43.44   38.51   43.12   43.24   42.50   41.13   42.56   42.91   42.91   42.21
    24: OM970801.1   77.08   93.94   95.34   96.57   95.97   95.85   96.58   96.62   96.83   97.24   96.80   96.62   95.88   95.24   95.57   98.66   97.05   98.86   98.32   96.77   98.54   97.98   98.65  100.00   97.34   99.24   98.99   99.01   98.99   99.05   98.65   98.50   98.95   96.44   96.42   97.14   97.53   98.43   36.63   35.83   38.18   41.30   41.57   40.35   41.00   41.84   41.63   40.77
    25: OM948745.1   77.16   93.60   96.01   96.57   95.65   97.14   96.58   96.77   96.63   97.04   96.96   96.62   97.00   95.92   95.94   97.89   97.06   97.71   98.32   98.29   97.08   97.98   97.99   97.34  100.00   97.72   98.32   98.34   98.32   97.91   98.65   98.50   99.30   96.96   96.57   97.36   97.91   98.22   36.14   35.83   37.58   41.30   41.60   41.00   40.94   41.54   41.96   40.91
    26: OM970799.1   77.78   94.28   96.41   96.95   96.64   96.40   96.96   97.16   97.02   97.44   97.35   97.30   96.63   95.92   95.94   99.05   97.35   99.24   98.99   97.15   98.75   98.65   99.33   99.24   97.72  100.00   99.66   99.67   99.66   99.43   99.32   98.80   99.30   97.35   96.97   97.36   97.91   98.62   36.63   35.83   38.18   41.30   40.94   40.35   40.37   41.63   41.42   40.53
    27: OQ048862.1   78.12   94.28   96.64   96.64   96.31   96.97   97.32   97.65   97.49   97.49   97.65   97.64   96.25   95.58   95.94   98.98   98.99   99.33   99.33   97.99   98.92   98.65   99.66   98.99   98.32   99.66  100.00  100.00  100.00   99.33   98.99   98.99   99.30   96.98   96.30   98.57   97.65   99.28   43.44   38.51   43.12   43.24   42.35   40.98   42.40   42.76   42.76   42.05
    28: OQ048857.1   78.05   94.28   96.69   96.69   96.63   97.02   97.35   97.68   97.54   97.54   97.68   97.64   96.25   95.58   95.94   99.00   99.01   99.34   99.33   98.01   98.94   98.65   99.66   99.01   98.34   99.67  100.00  100.00  100.00   99.34   98.99   99.01   99.30   97.02   96.36   98.59   97.68   99.30   43.44   38.51   43.12   43.24   42.31   40.96   42.51   42.86   42.86   42.16
    29: OQ048858.1   78.05   94.28   96.63   96.63   96.63   96.97   97.31   97.64   97.49   97.49   97.64   97.64   96.25   95.58   95.94   98.98   98.99   99.33   99.33   97.98   98.92   98.65   99.66   98.99   98.32   99.66  100.00  100.00  100.00   99.33   98.99   98.99   99.30   96.97   96.30   98.57   97.64   99.28   43.44   38.51   43.12   43.24   42.35   40.98   42.55   42.91   42.91   42.20
    30: OM970800.1   78.12   94.61   96.20   96.76   96.31   96.20   96.77   96.96   96.83   97.24   97.15   96.96   97.00   96.26   96.31   99.43   97.94   99.43   99.33   97.34   99.17   98.99   98.99   99.05   97.91   99.43   99.33   99.34   99.33  100.00   99.66   99.40   99.65   97.53   97.15   97.80   98.10   98.82   36.63   35.83   38.18   41.30   41.10   40.56   40.53   41.42   41.63   40.53
    31: OP600466.1   77.70   94.93   96.28   96.28   96.28   96.28   96.28   96.62   97.12   97.12   96.62   96.62   97.00   95.92   96.31   99.66   98.99   98.99   98.99   97.97   99.28   98.65   98.65   98.65   98.65   99.32   98.99   98.99   98.99   99.66  100.00   98.99   99.65   96.96   96.62   98.92   97.97   99.64   43.44   39.13   43.12   43.24   41.79   41.13   41.99   42.35   42.35   41.64
    32: OP257196.1   77.70   94.95   96.40   96.40   95.96   96.70   96.70   97.00   97.46   97.46   97.00   96.62   97.00   95.92   96.31   99.09   98.50   99.10   98.99   98.50   99.37   98.65   98.65   98.50   98.50   98.80   98.99   99.01   98.99   99.40   98.99  100.00   99.65   97.60   96.70   99.05   98.20   99.68   42.75   38.24   42.37   42.50   42.59   41.06   42.14   42.77   42.77   42.14
    33: OP600464.1   77.45   95.44   96.84   96.84   96.84   97.19   97.19   97.54   97.49   97.49   97.54   97.54   97.67   96.81   96.68   99.30   99.30   99.30   99.30   98.95   98.92   98.95   98.94   98.95   99.30   99.30   99.30   99.30   99.30   99.65   99.65   99.65  100.00   97.19   96.49   99.28   98.95   99.28   43.44   38.71   43.12   43.24   41.85   40.98   41.85   42.22   42.22   41.48
    34: OM961397.1   78.47   92.59   96.82   97.33   96.31   96.42   97.15   97.37   97.42   97.64   97.56   96.62   97.00   96.94   97.42   97.14   95.87   97.53   96.97   97.15   97.92   96.63   96.63   96.44   96.96   97.35   96.98   97.02   96.97   97.53   96.96   97.60   97.19  100.00   98.68   96.92   97.91   98.03   37.62   36.25   38.18   42.03   41.13   41.21   40.96   41.63   41.84   41.01
    35: OM993271.1   78.75   91.92   96.23   96.95   96.30   96.04   96.57   96.60   96.63   97.05   96.79   95.95   96.63   96.60   96.68   96.76   95.27   96.96   96.30   96.39   97.08   95.96   95.95   96.42   96.57   96.97   96.30   96.36   96.30   97.15   96.62   96.70   96.49   98.68  100.00   96.04   97.15   97.44   36.63   35.83   37.58   41.30   40.77   41.00   40.69   41.51   41.72   40.87
    36: ON008179.1   77.32   94.98   96.48   96.92   97.49   96.92   97.14   97.14   96.92   97.36   97.36   98.20   97.62   96.74   96.68   97.58   97.19   97.58   98.57   97.80   97.36   98.21   98.20   97.14   97.36   97.36   98.57   98.59   98.57   97.80   98.92   99.05   99.28   96.92   96.04  100.00   98.46   97.58   39.16   37.82   38.56   41.30   41.53   40.33   41.05   41.29   41.77   40.20
    37: OM961399.1   77.43   94.28   96.58   97.14   95.97   96.58   97.53   97.34   98.02   98.23   97.53   96.62   97.00   96.60   97.05   97.90   96.46   97.91   97.64   97.72   98.12   97.31   97.31   97.53   97.91   97.91   97.65   97.68   97.64   98.10   97.97   98.20   98.95   97.91   97.15   98.46  100.00   99.02   36.14   36.25   37.58   41.30   40.90   40.35   40.33   41.00   41.63   40.29
    38: OM985017.1   76.58   95.70   96.46   97.04   96.06   96.65   97.44   97.44   97.22   97.64   97.64   96.76   96.83   96.01   95.94   98.62   97.81   98.82   99.28   97.83   98.12   98.92   98.92   98.43   98.22   98.62   99.28   99.30   99.28   98.82   99.64   99.68   99.28   98.03   97.44   97.58   99.02  100.00   36.14   35.96   37.58   41.30   40.89   40.52   40.25   41.18   41.39   40.45
    39: KY012295.1   39.34   44.26   37.62   37.81   45.90   38.12   36.63   36.63   36.18   37.13   36.63   45.08   45.08   45.08   45.08   36.63   43.38   36.63   43.44   36.63   38.89   43.44   43.44   36.63   36.14   36.63   43.44   43.44   43.44   36.63   43.44   42.75   43.44   37.62   36.63   39.16   36.14   36.14  100.00   97.45   98.73   98.51   47.46   47.35   47.10   47.73   47.73   47.50
    40: KY012294.1   35.40   39.75   36.25   36.25   40.37   37.08   36.25   35.83   35.84   36.84   35.42   39.75   40.37   40.99   41.78   35.83   38.86   35.42   38.51   35.83   37.68   38.51   38.51   35.83   35.83   35.83   38.51   38.51   38.51   35.83   39.13   38.24   38.71   36.25   35.83   37.82   36.25   35.96   97.45  100.00   99.15   99.01   47.00   46.62   46.69   47.06   47.39   47.52
    41: KY548503.1   38.53   44.95   38.18   38.18   44.04   38.18   36.97   36.97   36.36   37.58   36.97   43.12   43.12   43.12   43.12   38.18   43.09   38.18   43.12   37.58   37.58   43.12   43.12   38.18   37.58   38.18   43.12   43.12   43.12   38.18   43.12   42.37   43.12   38.18   37.58   38.56   37.58   37.58   98.73   99.15  100.00  100.00   48.31   48.73   48.73   49.15   49.15   48.66
    42: KY548502.1   39.64   45.05   42.03   42.03   44.14   42.03   41.30   41.30   41.30   42.03   41.30   43.24   43.24   43.24   43.24   41.30   43.20   41.30   43.24   41.30   41.30   43.24   43.24   41.30   41.30   41.30   43.24   43.24   43.24   41.30   43.24   42.50   43.24   42.03   41.30   41.30   41.30   41.30   98.51   99.01  100.00  100.00   49.01   49.50   49.50   50.00   50.00   50.00
    43: KY548497.1   40.59   39.50   42.57   41.89   41.64   40.97   42.21   42.11   41.45   41.53   41.90   42.14   43.65   43.17   42.97   40.78   42.24   40.90   41.99   40.29   41.22   41.64   42.50   41.57   41.60   40.94   42.35   42.31   42.35   41.10   41.79   42.59   41.85   41.13   40.77   41.53   40.90   40.89   47.46   47.00   48.31   49.01  100.00   97.16   97.85   96.09   98.21   97.20
    44: KY548500.1   39.06   39.10   40.78   40.78   40.60   40.35   41.43   41.21   40.96   41.18   41.00   40.75   42.68   42.97   42.97   40.13   40.72   40.13   40.60   39.70   40.54   40.60   41.13   40.35   41.00   40.35   40.98   40.96   40.98   40.56   41.13   41.06   40.98   41.21   41.00   40.33   40.35   40.52   47.35   46.62   48.73   49.50   97.16  100.00   98.33   95.49   96.99   97.12
    45: KY548499.1   40.88   39.72   42.01   41.31   41.96   40.49   41.63   41.53   40.81   40.89   41.33   42.35   43.65   44.09   43.36   40.16   41.41   40.41   42.20   39.63   40.77   41.84   42.56   41.00   40.94   40.37   42.40   42.51   42.55   40.53   41.99   42.14   41.85   40.96   40.69   41.05   40.33   40.25   47.10   46.69   48.73   49.50   97.85   98.33  100.00   95.99   97.63   97.61
    46: KY548496.1   40.51   40.07   41.63   41.63   42.31   40.88   42.05   42.26   41.18   41.83   42.05   42.70   43.65   43.73   43.36   41.35   42.02   41.72   42.55   40.50   41.44   42.20   42.91   41.84   41.54   41.63   42.76   42.86   42.91   41.42   42.35   42.77   42.22   41.63   41.51   41.29   41.00   41.18   47.73   47.06   49.15   50.00   96.09   95.49   95.99  100.00   96.31   96.51
    47: KY548495.1   42.34   40.07   42.68   42.68   43.01   41.93   43.10   42.89   42.27   42.48   42.68   43.42   44.84   44.44   44.14   41.14   42.02   41.51   42.55   41.13   41.44   42.20   42.91   41.63   41.96   41.42   42.76   42.86   42.91   41.63   42.35   42.77   42.22   41.84   41.72   41.77   41.63   41.39   47.73   47.39   49.15   50.00   98.21   96.99   97.63   96.31  100.00   97.61
    48: KY548498.1   40.15   39.36   41.49   41.49   41.61   41.11   41.73   41.73   40.70   40.95   41.25   41.99   43.25   43.01   42.58   40.19   41.41   40.62   41.84   40.19   40.45   41.49   42.21   40.77   40.91   40.53   42.05   42.16   42.20   40.53   41.64   42.14   41.48   41.01   40.87   40.20   40.29   40.45   47.50   47.52   48.66   50.00   97.20   97.12   97.61   96.51   97.61  100.00
